# Supplementary material
Source: Frontiers journal article supplement (https://www.frontiersin.org/articles/346553)
Supplement: Image_1.PDF [file Image_1.PDF]

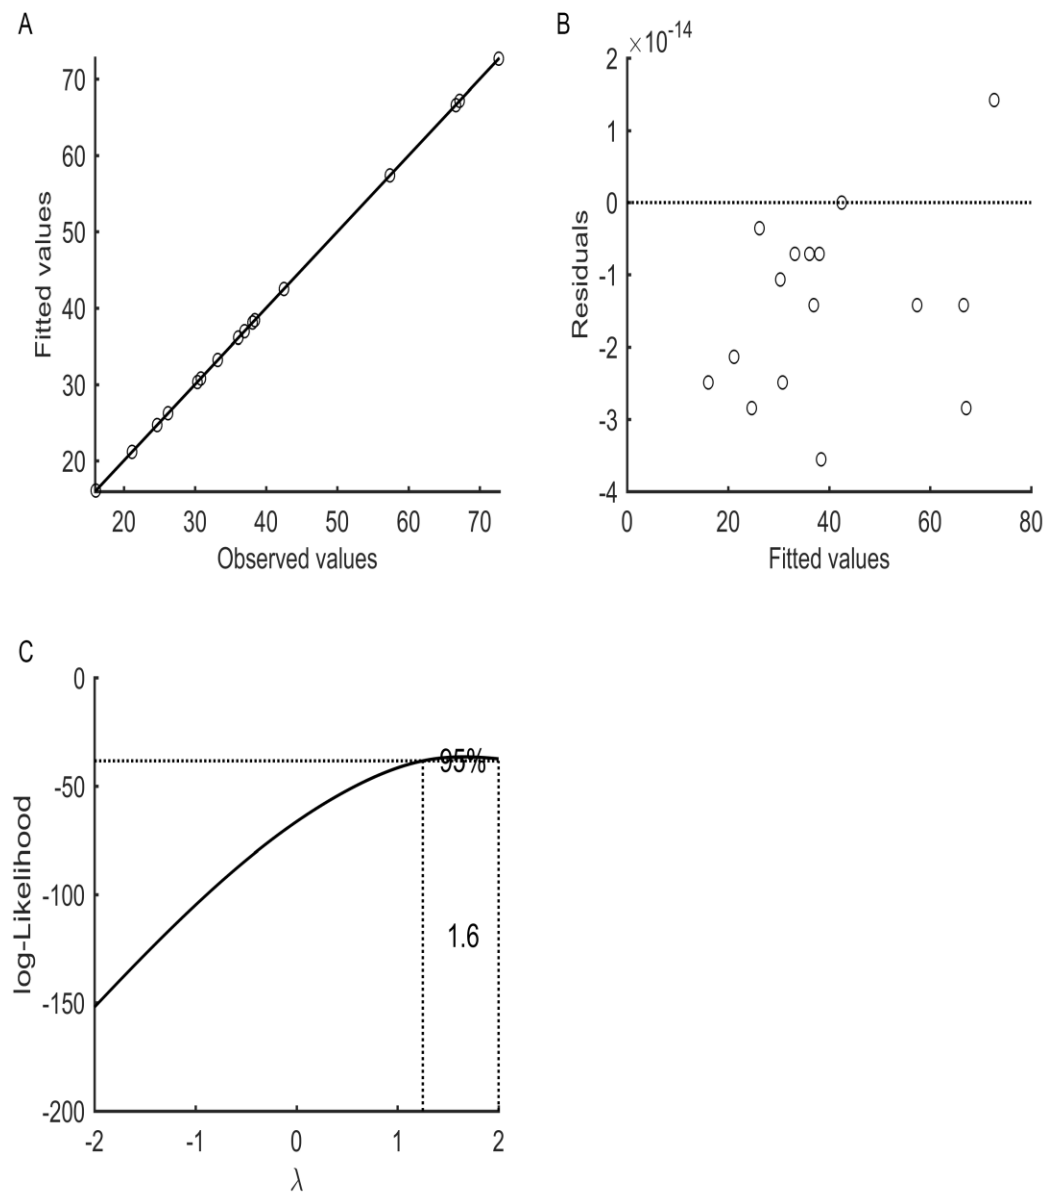

**Supplemental Figure 1** Statistical analysis for interaction model used in generation 2. (A) The correlation between experimentally tested efficacies (x-axis) and model predicted inhibition efficacies of the 16 drug combinations was shown. (B) Residuals versus the fitted values plot for the model. (C) Log-likelihoods for the parameter  $\lambda$  of the Box-Cox power transformation for the linear model.
